# Supplementary material for: Corn silk-derived biomass carbon materials for low-frequency microwave absorption and energy storage
Source: Royal Society of Chemistry journal article supplement (doi:10.1039/d4nr04960h), 2025-01-01
Supplement: d4nr04960h1.pdf [file d4nr04960h1.pdf]

## Supporting Information

### Corn Silk-derived Biomass Carbon Materials for Low-Frequency Microwave Absorption and Energy Storage

Juan Shi<sup>a</sup>, Xi Zhang<sup>a,\*</sup>, Hongyu Zhu<sup>a</sup>, Deren Li<sup>a</sup>, Ya Nie<sup>a</sup>, Bo Gao<sup>a</sup>, Gang Xiang<sup>a,\*</sup>

<sup>a</sup> College of Physics, Sichuan University, Chengdu 610064, China

\*Corresponding E-mails: xizhang@scu.edu.cn (X. Zhang); gxiang@scu.edu.cn (G. Xiang)

**Table S1** Comparison of microwave absorption properties of typical biomass-derived absorbers.

| MA Materials                                                              | Filling ratio(wt.%) | RL <sub>min</sub> (dB) | d <sub>RLmin</sub> (mm) | Frequency (GHz) | EAB (GHz) | d <sub>EAB</sub> (mm) |
|---------------------------------------------------------------------------|---------------------|------------------------|-------------------------|-----------------|-----------|-----------------------|
| Fe <sub>3</sub> O <sub>4</sub> /bagasse waste-derived carbon fiber        | 30                  | -48.2                  | 1.9                     | 15.6            | 5.1       | 1.9                   |
| Eggshell membrane-derived carbon fiber/CoFe <sub>2</sub> O <sub>4</sub>   | 30                  | -49.16                 | 2.5                     | 9.2             | -         | -                     |
| Walnut shells-derived carbon                                              | 70                  | -42.4                  | 2.0                     | 8.88            | 2.24      | 1.5                   |
| Loofah-sponge-derived carbon/CoFe <sub>2</sub> O <sub>4</sub>             | 50                  | -43.8                  | 3.0                     | 8.3             | -         | -                     |
| Aligned polyaniline/Fe <sub>3</sub> O <sub>4</sub> /loofah-derived carbon | 30                  | -44.8                  | 2.7                     | 10.67           | 4.69      | 2.7                   |
| Straw waste-derived carbon                                                | 10                  | -37                    | 2.5                     | 12.1            | 8.8       | 2.5                   |
| MnO/cube teak wood-derived carbon                                         | 30                  | -51.6                  | 2.47                    | 10.4            | -         | -                     |

---

Co<sub>3</sub>Fe<sub>7</sub>/shaddock peel-derived

|                |    |       |      |      |      |     |
|----------------|----|-------|------|------|------|-----|
| carbon         | 8  | -50.6 | 2.55 | 10.5 | 5.3  | 1.7 |
| BC8 this work  | 30 | -75   | 4.5  | 6.88 | 6.64 | 2.6 |
| BC10 this work | 30 | -55.4 | 4.51 | 7.2  | 6.32 | 2.8 |
| BC12 this work | 30 | -55.7 | 3.9  | 7.2  | 6.6  | 2.3 |

---

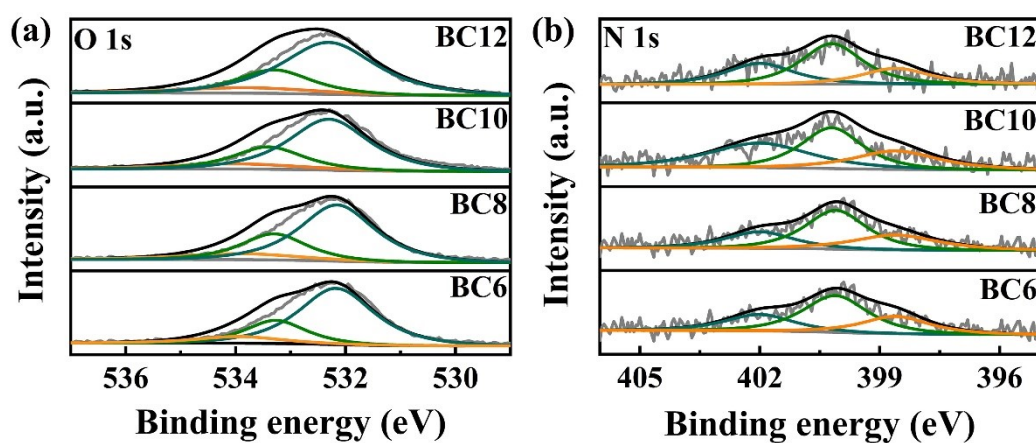

**Fig. S1** XPS patterns in (a) O 1s and (b) N 1s of BC6, BC8, BC10 and BC12.

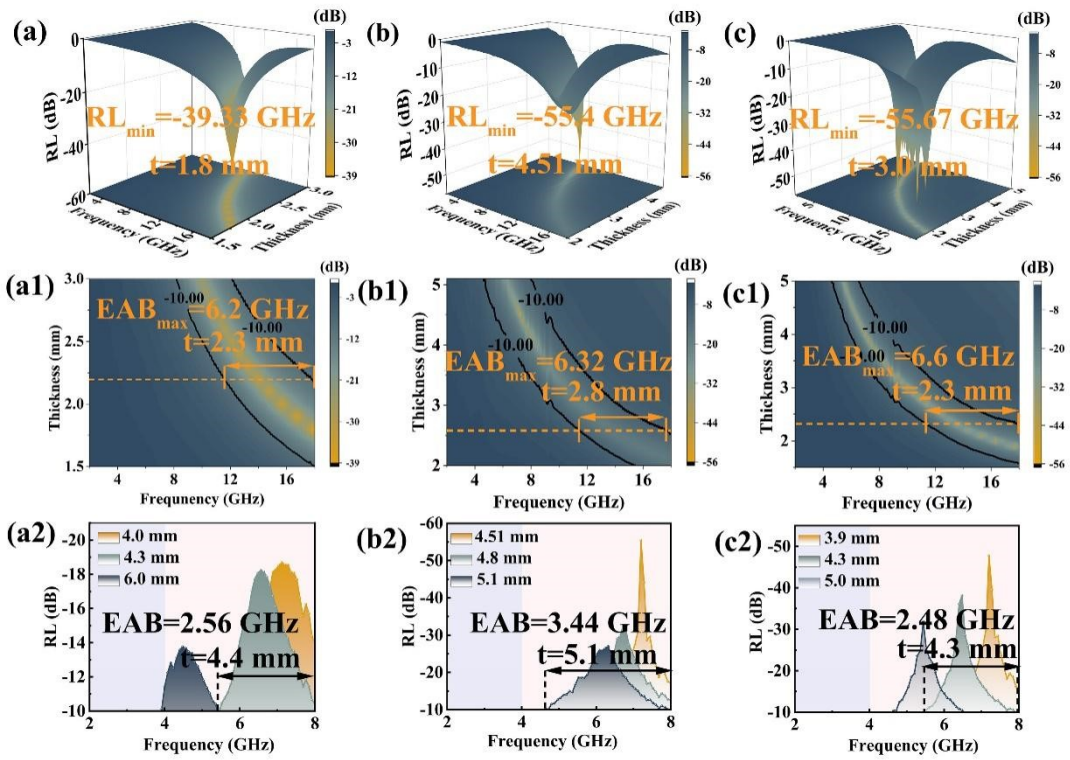

**Fig. S2** RL of 3D, 2D and contour line spectra for (a, a1, a2) BC6, (b, b1, b2) BC10, and (c, c1, c2) BC12, respectively.

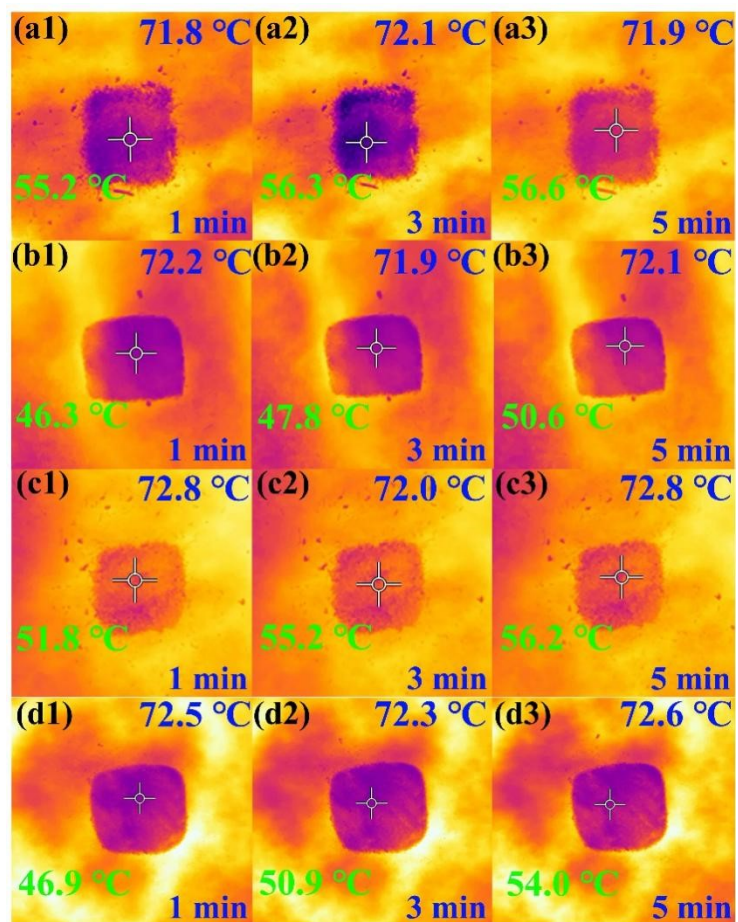

**Fig. S3** Thermal infrared images for (a, a1, a2) BC6, (b, b1, b2) BC8, (c, c1, c2) BC10, and (d, d1, d2) BC12, respectively.

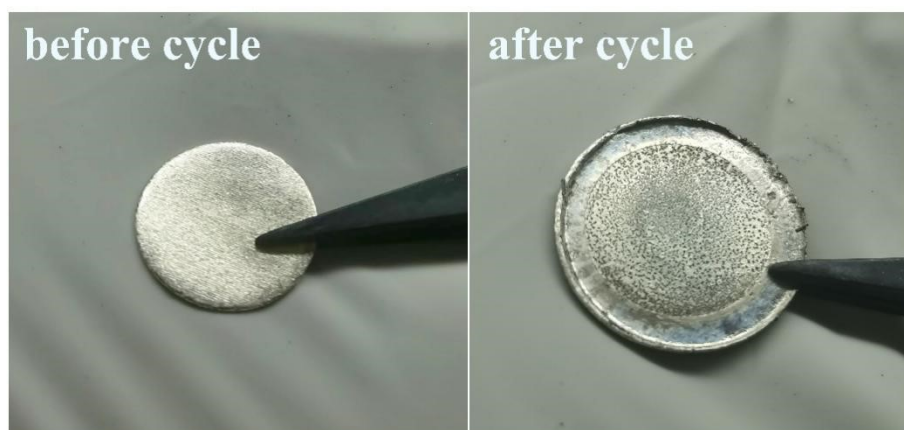

**Fig S4** Surface images of the Li cathode before and after cycling.
